# Supplementary material
Source: ML conference proceedings conference paper supplement (https://openaccess.thecvf.com/content/ICCV_2019/html/Brickwedde_Mono-SF_Multi-View_Geometry_ICCV_2019_paper.html)
Supplement: Supplementary file 1 [file Brickwedde_Mono-SF_Multi-View_Geometry_ICCV_2019_supplemental.zip]

Archive with 2 entries (2 files):
- BrickweddeAbrahamMester_ICCV19_MonoSF_supvideo.mp4
- BrickweddeAbrahamMester_ICCV19_MonoSF_supdoc.pdf
